# Supplementary material for: The First High-quality Reference Genome of Sika Deer Provides Insights into High-tannin Adaptation
Source: PubMed Central journal article supplement (PMC10372904; doi:10.1016/j.gpb.2022.05.008), 2022-06-16

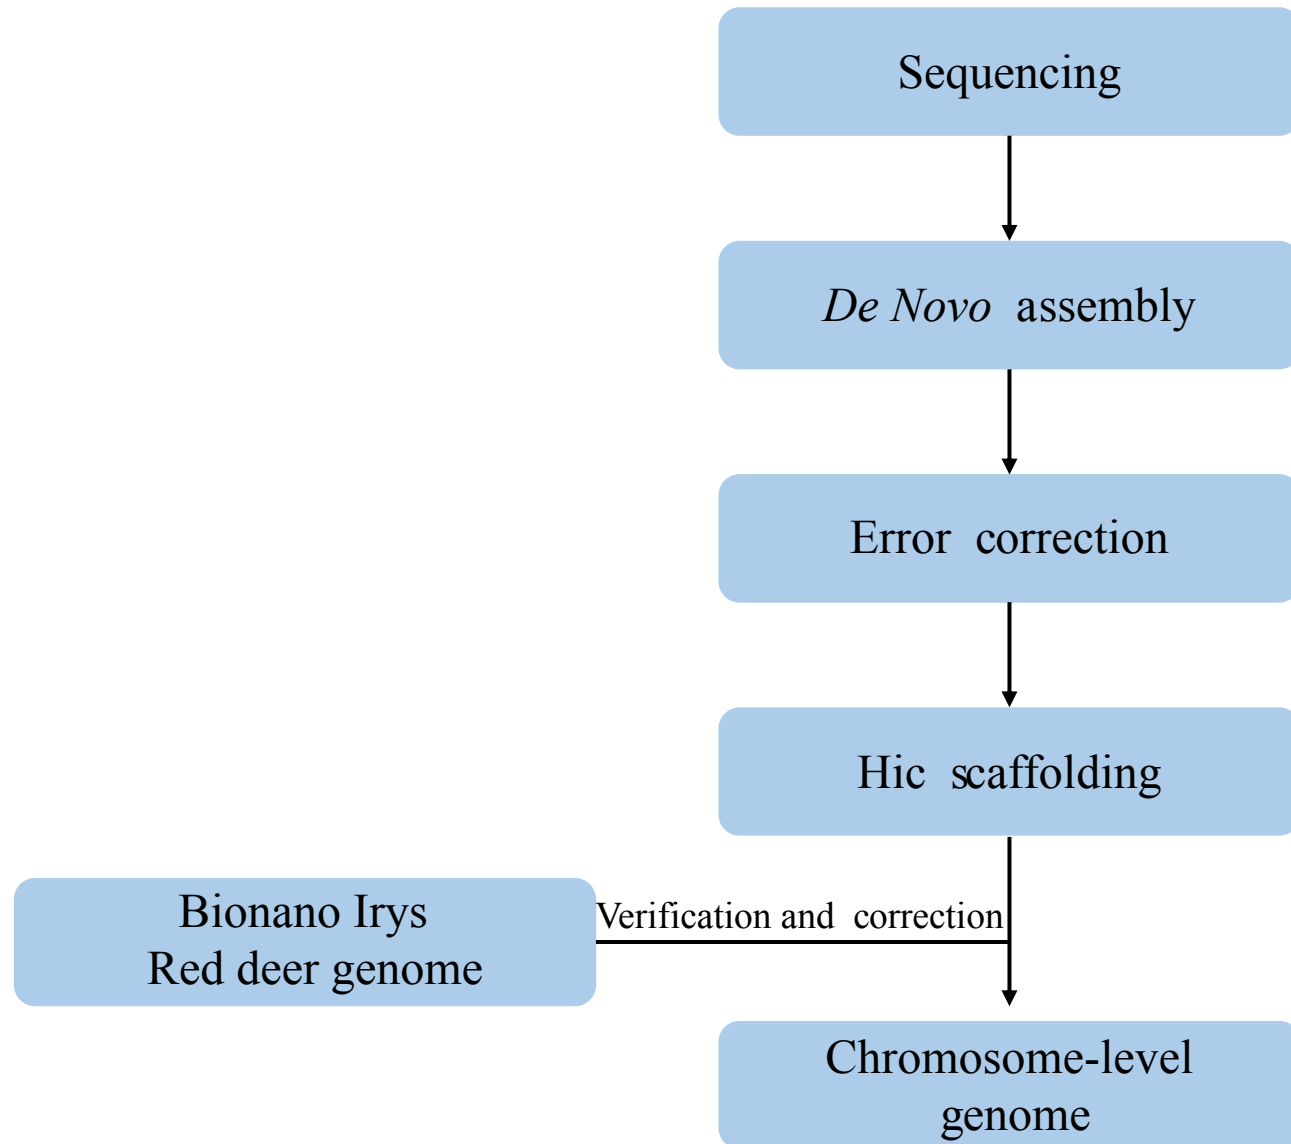

Supplement: mmc3.pdf [file mmc3.pdf]
