# Supplementary material for: The First High-quality Reference Genome of Sika Deer Provides Insights into High-tannin Adaptation
Source: PubMed Central journal article supplement (PMC10372904; doi:10.1016/j.gpb.2022.05.008), 2022-06-16
Supplement: mmc5.pdf [file mmc5.pdf]

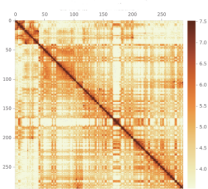

chr1

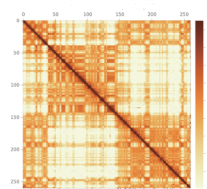

chr2

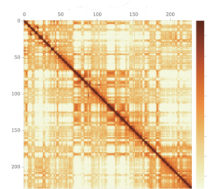

chr3

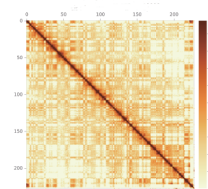

chr4

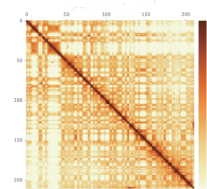

chr5

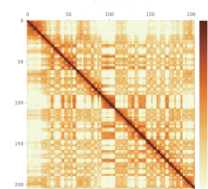

chr6

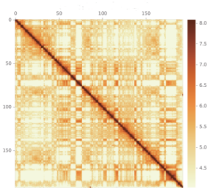

chr7

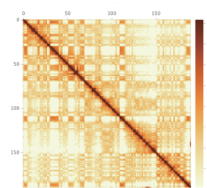

chr8

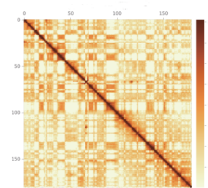

chr9

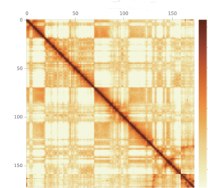

chr10

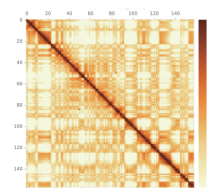

chr11

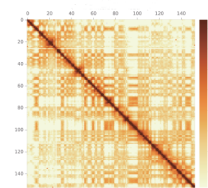

chr12

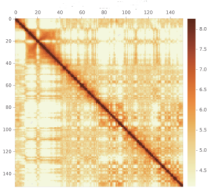

chr13

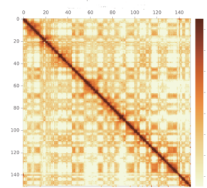

chr14

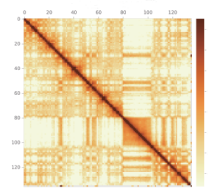

chr15

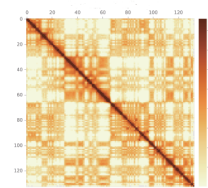

chr16

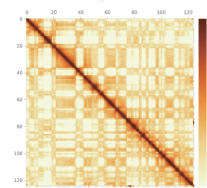

chr17

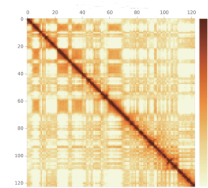

chr18

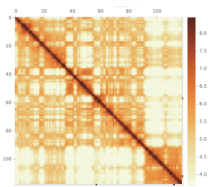

chr19

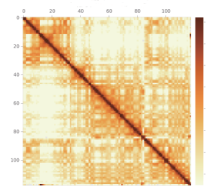

chr20

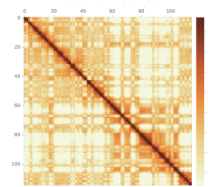

chr21

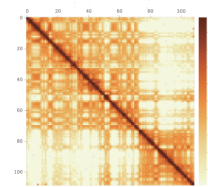

chr22

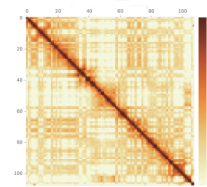

chr23

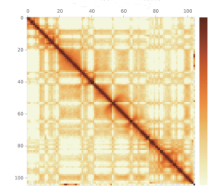

chr24

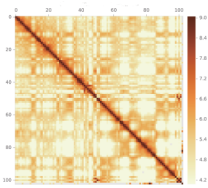

chr25

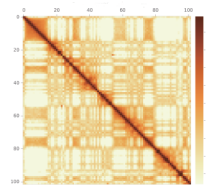

chr26

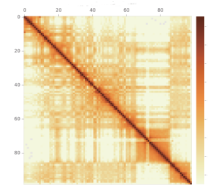

chr27

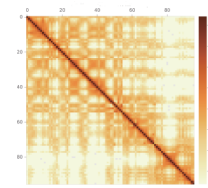

chr28

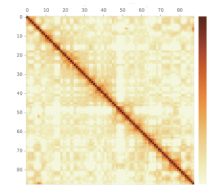

chr29

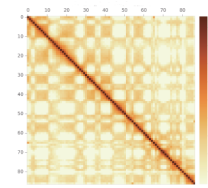

chr30

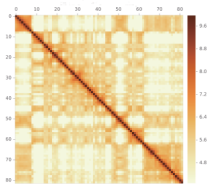

chr31

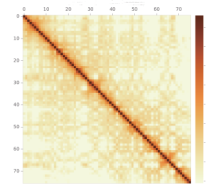

chr32

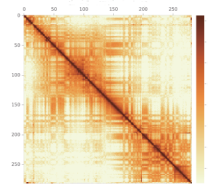

chrX
